# Supplementary material for: C. elegans as an in vivo model system for the phenotypic drug discovery for treating paraquat poisoning
Source: PeerJ. 2022 Feb 1;10:e12866. doi: 10.7717/peerj.12866 (PMC8815376; doi:10.7717/peerj.12866)
Supplement: Supplemental Information 1 — Data for the different parts of each of the figures. [file peerj-10-12866-s001.xlsx]

## Sheet: Description
Ji et al.
File listing the source data underlying Figs.1, 2 analysis.
Data of the differents parts of each of the figures are provided in a separate Excel sheet.

## Sheet: Mortality(Fig.1A)
Repeat 1		Live	Died	Total
	N2-Paraquat (0 mg/mL)	40	0	40
	N2-Paraquat (5 mg/mL)	40	0	40
	N2-Paraquat (10 mg/mL)	26	14	40
	N2-Paraquat (20 mg/mL)	0	40	40
Repeat 2		Live	Died	Total
	N2-Paraquat (0 mg/mL)	40	0	40
	N2-Paraquat (5 mg/mL)	40	0	40
	N2-Paraquat (10 mg/mL)	22	18	40
	N2-Paraquat (20 mg/mL)	0	40	40
Repeat 3		Live	Died	Total
	N2-Paraquat (0 mg/mL)	40	0	40
	N2-Paraquat (5 mg/mL)	40	0	40
	N2-Paraquat (10 mg/mL)	36	4	40
	N2-Paraquat (20 mg/mL)	0	40	40
Total		Live	Died	Total
	N2-Paraquat (0 mg/mL)	120	0	120
	N2-Paraquat (5 mg/mL)	120	0	120
	N2-Paraquat (10 mg/mL)	84	36	120
	N2-Paraquat (20 mg/mL)	0	120	120

## Sheet: Pumping rate(Fig.1B) 
		N2-Paraquat (0 mg/mL)	N2-Paraquat (5 mg/mL)	N2-Paraquat (10 mg/mL)
Repeat 1	1	104	110	56
	2	108	118	50
	3	97	110	47
	4	100	98	33
	5	90	90	35
	6	115	118	54
	7	110	107	46
	8	101	99	60
	9	116	78	42
	10	120	103	54
Repeat 2	1	111	116	35
	2	122	119	42
	3	115	108	49
	4	111	91	47
	5	116	97	60
	6	125	94	46
	7	114	90	34
	8	117	95	42
	9	110	110	50
	10	106	125	38
Repeat 3	1	120	104	17
	2	135	140	27
	3	117	124	35
	4	116	145	39
	5	127	129	32
	6	137	108	39
	7	113	122	38
	8	128	111	47
	9	125	121	36
	10	141	119	42
Average		115.567	109.967	42.4
p Value		As the control	0.147	< 0.0001
95% CI of difference		As the control	[-1.584, 12.78]	[65.98, 80.35]

## Sheet: Thrashes rate(Fig.1C)
		N2-Paraquat (0 mg/mL)	N2-Paraquat (5 mg/mL)	N2-Paraquat (10 mg/mL)
Repeat 1	1	104	112	40
	2	89	113	107
	3	99	110	87
	4	91	94	92
	5	78	90	113
	6	85	99	91
	7	89	115	117
	8	90	101	96
	9	90	100	113
	10	97	111	101
Repeat 2	1	112	115	80
	2	95	113	114
	3	117	120	85
	4	124	115	96
	5	112	113	120
	6	115	112	107
	7	108	89	125
	8	109	110	116
	9	109	108	98
	10	112	83	110
Repeat 3	1	108	125	119
	2	106	134	135
	3	112	112	117
	4	123	122	127
	5	97	93	114
	6	111	123	105
	7	120	132	113
	8	100	110	116
	9	96	89	122
	10	116	131	119
Average		103.8	109.8	106.5
p Value		As the control	0.2067	0.702
95% CI of difference		As the control	[-14.58, 2.578]	[-11.28, 5.878]

## Sheet: Survival(Fig.1D)  
Repeat 1		Number Dead			Percent Alive		Repeat 2		Number Dead			Percent Alive		Repeat 3		Number Dead [Censored]			Percent Alive
	Time (Days	N2	PQ 5mg/mL		N2	PQ 5mg/mL		Time (Days	N2	PQ 5mg/mL		N2	PQ 5mg/mL		Time (Days	N2	PQ 5mg/mL		N2	PQ 5mg/mL
	from 1-d of adulthood)	(N = 39)	(N = 40)		(N = 39)	(N = 40)		from 1-d of adulthood)	(N = 37)	(N = 38)		(N = 37)	(N = 38)		from 1-d of adulthood)	(N = 38)	(N = 39)		(N = 38)	(N = 39)
	0	0	0		100	100		0	0	0		100	100		0	0	0		100	100
	1	0	1		100	97.5		1	0	0		100	100		1	0	0		100	100
	2	0	0		100	97.5		2	0	0		100	100		2	0	0		100	100
	3	0	1		100	95		3	0	0		100	100		3	0	1		100	97.4359
	4	0	0		100	95		4	0	0		100	100		4	0	0		100	97.4359
	5	0	0		100	95		5	0	0		100	100		5	0	1		100	94.8718
	6	0	2		100	90		6	0	0		100	100		6	0	3		100	87.1795
	7	0	0		100	90		7	0	1		100	97.3684		7	0	3		100	79.4872
	8	2	3		94.8718	82.5		8	1	3		97.2973	89.4737		8	0	2		100	74.359
	9	1	2		92.3077	77.5		9	0	0		97.2973	89.4737		9	0	2		100	69.2308
	10	1	3		89.7436	70		10	2	1		91.8919	86.8421		10	0	4		100	58.9744
	11	2	3		84.6154	62.5		11	1	4		89.1892	76.3158		11	0	3		100	51.2821
	12	2	8		79.4872	42.5		12	2	2		83.7838	71.0526		12	0	1		100	48.7179
	13	4	4		69.2308	32.5		13	2	8		78.3784	50		13	2	6		94.7368	33.3333
	14	2	2		64.1026	27.5		14	2	6		72.973	34.2105		14	1	2		86.8421	28.2051
	15	2	2		58.9744	22.5		15	4	2		62.1622	28.9474		15	3	1		84.2105	25.641
	16	3	3		51.2821	15		16	2	2		56.7568	23.6842		16	3	1		76.3158	23.0769
	17	2	2		46.1538	10		17	1	1		54.0541	21.0526		17	4	4		68.4211	12.8205
	18	2	1		41.0256	7.5		18	3	2		45.9459	15.7895		18	7	2		57.8947	7.69231
	19	5	1		28.2051	5		19	3	2		37.8378	10.5263		19	6	2		39.4737	2.5641
	20	4	1		17.9487	2.5		20	5	1		24.3243	7.89474		20	4	1		23.6842	0
	21	3	1		10.2564	0		21	4	3		13.5135	0		21	4			13.1579
	22	0			10.2564			22	2			8.10811			22	1			2.63158
	23	3			2.5641			23	3			0			23	3			0
	24	1			0
Total		Number Dead [Censored]			Percent Alive
	Time (Days	N2	PQ 5mg/mL		N2	PQ 5mg/mL
	from 1-d of adulthood)	(N = 114)	(N = 117)		(N = 114)	(N = 117)
	0	0	0		100	100
	1	0	1		100	99.1453
	2	0	0		100	99.1453
	3	0	2		100	97.4359
	4	0	0		100	97.4359
	5	0	1		100	96.5812
	6	0	5		100	92.3077
	7	0	4		100	88.8889
	8	3	8		97.3684	82.0513
	9	1	4		96.4912	78.6325
	10	3	8		93.8596	71.7949
	11	3	10		91.2281	63.2479
	12	4	11		87.7193	53.8462
	13	8	18		80.7018	38.4615
	14	7	10		74.5614	29.9145
	15	7	5		68.4211	25.641
	16	8	6		61.4035	20.5128
	17	6	7		56.1404	14.5299
	18	9	5		48.2456	10.2564
	19	15	5		35.0877	5.98291
	20	15	3		21.9298	3.4188
	21	11	4		12.2807	0
	22	6			7.01754
	23	7			0.877193
	24	1			0

## Sheet: DCF image, analysis(Fig.2A-B)
					DCF fluorescence
								N2	N2-Paraquat	N2-Paraquat + CoQ10		N2
	N2				Sample number	Repeat 1	1	0.368	1.461	0.601
							2	0.115	3.775	2.823
							3	0.509	9.424	0.214
							4	0.611	3.587	7.672
							5	0.277	2.453	2.158
							6	1.178	5.226	4.983
							7	0.5	7.15	3.785
							8	0.915	2.657	6.846
							9	0.299	12.707	3.96
							10	0.273	9.713	1.183		N2-Paraquat
	N2-Paraquat					Repeat 2	1	0.72	2.999	6.546
							2	0.085	7.476	0.292
							3	2.085	7.558	2.044
							4	0.132	7.384	4.442
							5	1.04	2.876	5.229
							6	0.558	3.32	0.326
							7	1.405	2.407	5.502
							8	0.208	4.602	8.328
							9	1.092	8.294	0.873
							10	0.647	1.549	0.497		N2-Paraquat + CoQ10
	N2-Paraquat + CoQ10					Repeat 3	1	0.114	2.981	4.038
							2	0.233	4.977	5.817
							3	0.922	8.655	5.369
							4	0.01	2.347	5.929
							5	0.488	4.329	5.008
							6	1.813	8.094	2.025
							7	0.778	1.883	9.501
							8	0.177	6.969	5.886
							9	0.93	5.936	2.825
							10	0.097	11.062	2.093
					Average			0.6193	5.4617	3.89317
					p Value			< 0.0001	-	0.0209
					95% CI of difference			[3.484, 6.201]	-	[0.2102, 2.927]
									N2-Paraquat as the control.

## Sheet: Mitochondrial image(Fig.2C)
	N2
	N2-Paraquat
	N2-Paraquat + CoQ10

## Sheet: Mitochondrial analysis(Fig.2D)
	Mitochondrial area
				N2	N2-Paraquat	N2-Paraquat + CoQ10
	Sample number	Repeat 1	1	32.265	12.738	44.59
			2	32.794	31.047	30.165
			3	47.383	10.437	28.5
			4	44.479	35.41	30.584
			5	40.191	19.099	30.287
		Repeat 2	1	39.468	33.687	28.777
			2	36.924	31.488	26.201
			3	34.52	37.946	31.654
			4	22.219	28.75	33.521
			5	45.328	29.899	32.017
		Repeat 3	1	33.906	12.476	42.039
			2	29.198	20.926	36.692
			3	46.853	38.703	41.464
			4	43.789	34.181	31.002
			5	23.337	22.588	31.008
	Average			36.8436	26.625	33.2334
	p Value			0.0019	-	0.0491
	95% CI of difference			[-16.80, -3.632]	-	[-13.19, -0.02219]
					N2-Paraquat as the control.

## Sheet: Content of MDA(Fig.2E)
Content of MDA(nmol/mgprot)
	N2	N2-Paraquat	N2-Paraquat + CoQ10
Repeat 1	120.576	2175.17	1310.19
Repeat 2	210.019	1902.93	1388.46
Repeat 3	258.34	2330.59	841.915
Average	196.312	2136.23	1180.19
p Value	<0.0001	-	0.0029
95% CI of difference	[1437, 2443]	-	[452.7, 1459]
	N2-Paraquat as the control.

## Sheet: Survival(Fig.2F)
Repeat 1		Number Dead						Percent Alive
	Time (Days	N2	PQ 5mg/mL	PQ + CoQ10 0.6 mg/mL	PQ + CoQ10 1.2 mg/mL	PQ + CoQ10 1.8 mg/mL		N2	PQ 5mg/mL	PQ + CoQ10 0.6 mg/mL	PQ + CoQ10 1.2 mg/mL	PQ + CoQ10 1.8 mg/mL
	from 1-d of adulthood)	(N = 37)	(N = 39)	(N = 40)	(N = 40)	(N = 40)		(N = 37)	(N = 39)	(N = 40)	(N = 40)	(N = 40)
	0	0	0	0	0	0		100	100	100	100	100
	1	0	0	0	0	0		100	100	100	100	100
	2	0	1	0	0	0		100	97.4359	100	100	100
	3	0	2	1	0	0		100	92.3077	97.5	100	100
	4	0	1	1	2	1		100	89.7436	95	95	97.5
	5	0	0	1	1	0		100	89.7436	92.5	92.5	97.5
	6	0	2	3	1	1		100	84.6154	85	90	95
	7	0	0	2	0	0		100	84.6154	80	90	95
	8	0	3	5	2	3		100	76.9231	67.5	85	87.5
	9	1	3	1	3	3		97.2973	69.2308	65	77.5	80
	10	2	2	1	2	0		91.8919	64.1026	62.5	72.5	80
	11	3	2	2	2	1		83.7838	58.9744	57.5	67.5	77.5
	12	3	7	3	3	3		75.6757	41.0256	50	60	70
	13	3	1	2	2	3		67.5676	38.4615	45	55	62.5
	14	3	3	2	2	4		59.4595	30.7692	40	50	52.5
	15	2	3	2	2	2		54.0541	23.0769	35	45	47.5
	16	3	0	2	3	1		45.9459	23.0769	30	37.5	45
	17	4	2	1	2	1		35.1351	17.9487	27.5	32.5	42.5
	18	1	0	0	1	2		32.4324	17.9487	27.5	30	37.5
	19	5	2	2	2	0		18.9189	12.8205	22.5	25	37.5
	20	1	3	3	3	5		16.2162	5.12821	15	17.5	25
	21	0	2	3	5	6		16.2162	0	7.5	5	10
	22	3		3	2	2		8.10811		0	0	5
	23	0				2		8.10811				0
	24	1						5.40541
	25	2						0
Repeat 2		Number Dead						Percent Alive
	Time (Days	N2	PQ 5mg/mL	PQ + CoQ10 0.6 mg/mL	PQ + CoQ10 1.2 mg/mL	PQ + CoQ10 1.8 mg/mL		N2	PQ 5mg/mL	PQ + CoQ10 0.6 mg/mL	PQ + CoQ10 1.2 mg/mL	PQ + CoQ10 1.8 mg/mL
	from 1-d of adulthood)	(N = 36)	(N = 40)	(N = 39)	(N = 40)	(N = 40)		(N = 36)	(N = 40)	(N = 39)	(N = 40)	(N = 40)
	0	0	0	0	0	0		100	100	100	100	100
	1	0	0	0	0	0		100	100	100	100	100
	2	0	0	0	0	0		100	100	100	100	100
	3	0	0	0	0	0		100	100	100	100	100
	4	0	1	0	2	0		100	97.5	100	95	100
	5	0	0	0	0	0		100	97.5	100	95	100
	6	0	0	1	0	0		100	97.5	97.4359	95	100
	7	0	0	0	0	0		100	97.5	97.4359	95	100
	8	0	1	0	0	2		100	95	97.4359	95	95
	9	0	2	0	0	0		100	90	97.4359	95	95
	10	0	5	0	1	1		100	77.5	97.4359	92.5	92.5
	11	0	4	3	1	1		100	67.5	89.7436	90	90
	12	1	1	2	1	0		97.2222	65	84.6154	87.5	90
	13	3	1	2	1	2		88.8889	62.5	79.4872	85	85
	14	3	1	1	2	0		80.5556	60	76.9231	80	85
	15	2	3	3	5	3		75	52.5	69.2308	67.5	77.5
	16	3	5	5	5	2		66.6667	40	56.4103	55	72.5
	17	2	4	3	2	6		61.1111	30	48.7179	50	57.5
	18	1	3	3	2	1		58.3333	22.5	41.0256	45	55
	19	5	2	5	4	5		44.4444	17.5	28.2051	35	42.5
	20	7	2	5	4	4		25	12.5	15.3846	25	32.5
	21	3	2	2	4	3		16.6667	7.5	10.2564	15	25
	22	4	3	2	4	5		5.55556	0	5.12821	5	12.5
	23	2		2	2	5		0		0	0	0
Repeat 3		Number Dead						Percent Alive
	Time (Days	N2	PQ 5mg/mL	PQ + CoQ10 0.6 mg/mL	PQ + CoQ10 1.2 mg/mL	PQ + CoQ10 1.8 mg/mL		N2	PQ 5mg/mL	PQ + CoQ10 0.6 mg/mL	PQ + CoQ10 1.2 mg/mL	PQ + CoQ10 1.8 mg/mL
	from 1-d of adulthood)	(N = 37)	(N = 40)	(N = 40)	(N = 40)	(N = 40)		(N = 37)	(N = 40)	(N = 40)	(N = 40)	(N = 40)
	0	0	0	0	0	0		100	100	100	100	100
	1	0	0	0	0	0		100	100	100	100	100
	2	0	0	0	1	0		100	100	100	97.5	100
	3	0	0	0	0	0		100	100	100	97.5	100
	4	0	1	0	0	0		100	97.5	100	97.5	100
	5	0	0	2	0	1		100	92.5	95	97.5	97.5
	6	0	0	0	1	1		100	92.5	95	95	95
	7	0	2	1	1	1		100	87.5	92.5	92.5	92.5
	8	0	2	2	1	0		100	82.5	87.5	90	92.5
	9	0	4	4	4	3		100	72.5	77.5	80	85
	10	1	7	4	3	5		97.2973	55	67.5	72.5	72.5
	11	3	2	2	2	1		89.1892	50	62.5	67.5	70
	12	3	3	4	3	2		81.0811	42.5	52.5	60	65
	13	4	2	5	7	8		70.2703	37.5	40	42.5	45
	14	1	4	3	3	2		67.5676	27.5	32.5	35	40
	15	3	4	3	3	3		59.4595	17.5	25	27.5	32.5
	16	3	2	1	2	4		51.3514	12.5	22.5	22.5	22.5
	17	1	2	3	5	2		48.6486	7.5	15	10	17.5
	18	2	0	1	0	1		43.2432	7.5	12.5	10	15
	19	4	1	3	3	5		32.4324	5	5	2.5	2.5
	20	1	2	2	1	1		29.7297	0	0	0	0
	21	3						21.6216
	22	4						10.8108
	23	3						2.7027
	24	1						0
Total		Number Dead						Percent Alive
	Time (Days	N2	PQ 5mg/mL	PQ + CoQ10 0.6 mg/mL	PQ + CoQ10 1.2 mg/mL	PQ + CoQ10 1.8 mg/mL		N2	PQ 5mg/mL	PQ + CoQ10 0.6 mg/mL	PQ + CoQ10 1.2 mg/mL	PQ + CoQ10 1.8 mg/mL
	from 1-d of adulthood)	(N = 110)	(N = 119)	(N = 119)	(N = 120)	(N = 120)		(N = 110)	(N = 119)	(N = 119)	(N = 120)	(N = 120)
	0	0	0	0	0	0		100	100	100	100	100
	1	0	0	0	0	0		100	100	100	100	100
	2	0	1	0	1	0		100	99.1597	100	99.1667	100
	3	0	2	1	0	0		100	97.479	99.1597	99.1667	100
	4	0	3	1	4	1		100	94.958	98.3193	95.8333	99.1667
	5	0	0	3	1	1		100	93.2773	95.7983	95	98.3333
	6	0	2	4	2	2		100	91.5966	92.437	93.3333	96.6667
	7	0	2	3	1	1		100	89.916	89.916	92.5	95.8333
	8	0	6	7	3	5		100	84.8739	84.0336	90	91.6667
	9	1	9	5	7	6		99.0909	77.3109	79.8319	84.1667	86.6667
	10	3	14	5	6	6		96.3636	65.5462	75.6303	79.1667	81.6667
	11	6	8	7	5	3		90.9091	58.8235	69.7479	75	79.1667
	12	7	11	9	7	5		84.5455	49.5798	62.1849	69.1667	75
	13	10	4	9	10	13		75.4545	46.2185	54.6218	60.8333	64.1667
	14	7	8	6	7	6		69.0909	39.4958	49.5798	55	59.1667
	15	7	10	8	10	8		62.7273	31.0924	42.8571	46.6667	52.5
	16	9	7	8	10	7		54.5455	25.2101	36.1345	38.3333	46.6667
	17	7	8	7	9	9		48.1818	18.4874	30.2521	30.8333	39.1667
	18	4	3	4	3	4		44.5455	15.9664	26.8908	28.3333	35.8333
	19	14	5	10	9	10		31.8182	11.7647	18.4874	20.8333	27.5
	20	9	7	10	8	10		23.6364	5.88235	10.084	14.1667	19.1667
	21	6	4	5	9	9		18.1818	2.52101	5.88235	6.66667	11.6667
	22	11	3	5	6	7		8.18182	0	1.68067	1.66667	5.83333
	23	5		2	2	7		3.63636		0	0	0
	24	2						1.81818
	25	2						0

[truncated: 1 more sheets: Sheet7]
