# Supplementary material for: C. elegans as an in vivo model system for the phenotypic drug discovery for treating paraquat poisoning
Source: PeerJ. 2022 Feb 1;10:e12866. doi: 10.7717/peerj.12866 (PMC8815376; doi:10.7717/peerj.12866)
Supplement: Supplemental Information 2 — Data for the different parts of each of the figures. [file peerj-10-12866-s002.xlsx]

## Sheet: Description
Ji et al.
File listing the source data underlying Fig. S2 analysis.
Data of the differents parts of each of the figures are provided in a separate Excel sheet.

## Sheet: DCF image, analysis(Fig.S2 A-B)
DCF fluorescence
			N2	CoQ10 1.8 mg/mL		N2
Sample number	Repeat 1	1	0.722	7.687
		2	0.094	6.81
		3	0.389	13.092
		4	0.376	9.431
		5	0.163	14.137
		6	0.024	13.602
		7	0.984	13.938
		8	0.494	15.78
		9	0.999	12.73
		10	0.771	12.727		CoQ10 1.8 mg/mL
	Repeat 2	1	1.233	13.932
		2	0.861	15.702
		3	1.199	15.242
		4	1.714	8.788
		5	0.606	10.263
		6	0.238	11.211
		7	2.059	10.984
		8	0.27	13.777
		9	0.713	10.074
		10	2.428	12.192
	Repeat 3	1	0.316	17.006
		2	0.37	13.206
		3	0.035	14.964
		4	0.13	11.992
		5	0.141	15.284
		6	0.08	16.404
		7	0.483	18.191
		8	0.181	16.437
		9	0.995	27.67
Average			0.657517	13.5604
p Value			As the control	< 0.0001
95% CI of difference			As the control	[-14.27, -11.54]

## Sheet: Mitochondrial image(Fig.S2 C)
	N2
	N2-Paraquat

## Sheet: Mitochondrial analysis(Fig.S2D)
	Mitochondrial area
				N2	CoQ10 1.8 mg/mL
	Sample number	Repeat 1	1	22.379	6.363
			2	30.422	6.08
			3	36.974	18.216
			4	37.863	15.144
			5	39.113	10.78
		Repeat 2	1	21.317	22.402
			2	30.933	4.888
			3	54.317	10.997
			4	38.019	9.216
			5	30.593	5.714
		Repeat 3	1	39.509	6.752
			2	28.87	7.912
			3	30.887	15.166
			4	30.674	12.983
			5	34.418	8.817
	Average			33.7525	10.762
	p Value			As the control	< 0.0001
	95% CI of difference			As the control	[18.37, 27.61]

## Sheet: Content of MDA(Fig.S2 E)
Content of MDA(nmol/mgprot)
	N2	CoQ10 1.8 mg/mL
Repeat 1	207.075	3043.2
Repeat 2	167.178	4291.95
Repeat 3	418.206	3633.88
Average	264.153	3656.35
p Value	As the control	< 0.0001
95% CI of difference	As the control	[-4284, -2501]

## Sheet: Survival(Fig.S2 F)
Repeat 1		Number Dead					Percent Alive
	Time (Days	N2	CoQ10 0.6 mg/mL	CoQ10 1.2 mg/mL	CoQ10 1.8 mg/mL		N2	PQ + CoQ10 0.6 mg/mL	PQ + CoQ10 1.2 mg/mL	PQ + CoQ10 1.8 mg/mL
	from 1-d of adulthood)	(N = 34)	(N = 34)	(N = 29)	(N = 31)		(N = 34)	(N = 34)	(N = 29)	(N = 31)
	0	0	0	0	0		100	100	100	100
	1	0	0	0	0		100	100	100	100
	2	0	0	0	0		100	100	100	100
	3	0	0	0	0		100	100	100	100
	4	0	0	0	0		100	100	100	100
	5	0	0	0	0		100	100	100	100
	6	0	0	0	1		100	100	100	96.7742
	7	0	0	0	1		100	100	100	93.5484
	8	0	0	0	3		100	100	100	83.871
	9	1	0	0	1		97.0588	100	100	80.6452
	10	1	0	1	1		94.1176	100	96.5517	77.4194
	11	2	0	0	0		88.2353	100	96.5517	77.4194
	12	3	1	1	3		79.4118	97.0588	93.1034	67.7419
	13	2	0	2	2		73.5294	97.0588	86.2069	61.2903
	14	0	0	1	0		73.5294	97.0588	82.7586	61.2903
	15	1	0	0	3		70.5882	97.0588	82.7586	51.6129
	16	2	1	2	1		64.7059	94.1176	75.8621	48.3871
	17	3	0	1	0		55.8824	94.1176	72.4138	48.3871
	18	0	1	0	2		55.8824	91.1765	72.4138	41.9355
	19	2	0	1	1		50	91.1765	68.9655	38.7097
	20	5	1	3	3		35.2941	88.2353	58.6207	29.0323
	21	0	0	2	2		35.2941	88.2353	51.7241	22.5806
	22	1	0	1	0		32.3529	88.2353	48.2759	22.5806
	23	5	1	2	2		17.6471	85.2941	41.3793	16.129
	24	2	3	3	4		11.7647	76.4706	31.0345	3.22581
	25	1	1	2	1		8.82353	73.5294	24.1379	0
	26	2	1	2			2.94118	70.5882	17.2414
	27	1	7	2			0	50	10.3448
	28		3	3				41.1765	0
	29		4					29.4118
	30		4					17.6471
	31		2					11.7647
	32		1					8.82353
	33		0					8.82353
	34		0					8.82353
	35		3					0
Repeat 2		Number Dead					Percent Alive
	Time (Days	N2	PQ + CoQ10 0.6 mg/mL	PQ + CoQ10 1.2 mg/mL	PQ + CoQ10 1.8 mg/mL		N2	PQ + CoQ10 0.6 mg/mL	PQ + CoQ10 1.2 mg/mL	PQ + CoQ10 1.8 mg/mL
	from 1-d of adulthood)	(N = 29)	(N = 32)	(N = 29)	(N = 36)		(N = 29)	(N = 32)	(N = 29)	(N = 36)
	0	0	0	0	0		100	100	100	100
	1	0	0	0	0		100	100	100	100
	2	0	0	0	0		100	100	100	100
	3	0	0	0	0		100	100	100	100
	4	0	0	0	0		100	100	100	100
	5	0	0	0	0		100	100	100	100
	6	0	0	0	2		100	100	100	94.4444
	7	0	0	0	2		100	100	100	88.8889
	8	0	0	0	1		100	100	100	86.1111
	9	0	0	0	0		100	100	100	86.1111
	10	2	0	0	2		93.1034	100	100	80.5556
	11	1	0	0	0		89.6552	100	100	80.5556
	12	2	0	1	4		82.7586	100	96.5517	69.4444
	13	2	0	2	2		75.8621	100	89.6552	63.8889
	14	1	0	0	3		72.4138	100	89.6552	55.5556
	15	1	0	1	0		68.9655	100	86.2069	55.5556
	16	1	0	1	2		65.5172	100	82.7586	50
	17	1	0	0	3		62.069	100	82.7586	41.6667
	18	1	2	2	1		58.6207	93.75	75.8621	38.8889
	19	3	1	2	1		48.2759	90.625	68.9655	36.1111
	20	0	1	4	2		48.2759	87.5	55.1724	30.5556
	21	1	1	2	0		44.8276	84.375	48.2759	30.5556
	22	1	0	1	3		41.3793	84.375	44.8276	22.2222
	23	3	0	1	1		31.0345	84.375	41.3793	19.4444
	24	3	1	3	2		20.6897	81.25	31.0345	13.8889
	25	1	0	1	1		17.2414	81.25	27.5862	11.1111
	26	1	3	2	4		13.7931	71.875	20.6897	0
	27	3	6	2			3.44828	53.125	13.7931
	28	1	4	2			0	40.625	6.89655
	29		2	2				34.375	0
	30		5					18.75
	31		2					12.5
	32		3					3.125
	33		0					3.125
	34		1					0
Total		Number Dead					Percent Alive
	Time (Days	N2	PQ + CoQ10 0.6 mg/mL	PQ + CoQ10 1.2 mg/mL	PQ + CoQ10 1.8 mg/mL		N2	PQ + CoQ10 0.6 mg/mL	PQ + CoQ10 1.2 mg/mL	PQ + CoQ10 1.8 mg/mL
	from 1-d of adulthood)	(N = 63)	(N = 66)	(N = 58)	(N = 67)		(N = 63)	(N = 66)	(N = 58)	(N = 67)
	0	0	0	0	0		100	100	100	100
	1	0	0	0	0		100	100	100	100
	2	0	0	0	0		100	100	100	100
	3	0	0	0	0		100	100	100	100
	4	0	0	0	0		100	100	100	100
	5	0	0	0	0		100	100	100	100
	6	0	0	0	3		100	100	100	95.5224
	7	0	0	0	3		100	100	100	91.0448
	8	0	0	0	4		100	100	100	85.0746
	9	1	0	0	1		98.4127	100	100	83.5821
	10	3	0	1	3		93.6508	100	98.2759	79.1045
	11	3	0	0	0		88.8889	100	98.2759	79.1045
	12	5	1	2	7		80.9524	98.4848	94.8276	68.6567
	13	4	0	4	4		74.6032	98.4848	87.931	62.6866
	14	1	0	1	3		73.0159	98.4848	86.2069	58.209
	15	2	0	1	3		69.8413	98.4848	84.4828	53.7313
	16	3	1	3	3		65.0794	96.9697	79.3103	49.2537
	17	4	0	1	3		58.7302	96.9697	77.5862	44.7761
	18	1	3	2	3		57.1429	92.4242	74.1379	40.2985
	19	5	1	3	2		49.2063	90.9091	68.9655	37.3134
	20	5	2	7	5		41.2698	87.8788	56.8966	29.8507
	21	1	1	4	2		39.6825	86.3636	50	26.8657
	22	2	0	2	3		36.5079	86.3636	46.5517	22.3881
	23	8	1	3	3		23.8095	84.8485	41.3793	17.9104
	24	5	4	6	6		15.873	78.7879	31.0345	8.95522
	25	2	1	3	2		12.6984	77.2727	25.8621	5.97015
	26	3	4	4	4		7.93651	71.2121	18.9655	0
	27	4	13	4			1.5873	51.5152	12.069
	28	1	7	5			0	40.9091	3.44828
	29		6	2				31.8182	0
	30		9					18.1818
	31		4					12.1212
	32		4					6.06061
	33		0					6.06061
	34		1					4.54545
	35		3					0
