# Supplementary material for: C. elegans as an in vivo model system for the phenotypic drug discovery for treating paraquat poisoning
Source: PeerJ. 2022 Feb 1;10:e12866. doi: 10.7717/peerj.12866 (PMC8815376; doi:10.7717/peerj.12866)
Supplement: Supplemental Information 3 — Data for the different parts of each of the figures. [file peerj-10-12866-s003.xlsx]

## Sheet: Description
Ji et al.
File listing the source data underlying Fig.3 analysis.
Data of the differents parts of each of the figures are provided in a separate Excel sheet.

## Sheet: Survival(Fig.3A)
Survival rate of mice after PQ intoxication
	Paraquat	Paraquat + CoQ 62.5 mg/kg	Paraquat + CoQ 125 mg/kg
Day-1	9	9	10
Day-2	6	7	10
Day-3	4	3	8
Day-4	2	3	6
Day-5	1	2	3
Day-6	1	1	3
Day-7	1	1	3

## Sheet: DCF fluorescence(Fig.3B) 
DCF Fluorescence
	Control	Paraquat	Paraquat + CoQ 62.5 mg/kg	Paraquat + CoQ 125 mg/kg
Repeat 1	6851	11914	8851	3888
Repeat 2	3618	9619	7651	4350
Repeat 3	6727	13436	7923	3904
Average	5732	11656.3	8141.67	4047.33
p Value	0.0019	-	0.034	0.0004
95% CI of difference	[2702, 9147]	-	[292.4, 6737]	[4387, 10831]
		Paraquat as the control.

## Sheet: Content of MDA(Fig.3C)
Content of MDA(nmol/mgprot)
	Control	Paraquat	Paraquat + CoQ 62.5 mg/kg	Paraquat + CoQ 125 mg/kg
Repeat 1	3.87254	5.2428	3.67369	3.77836
Repeat 2	2.66147	4.46604	3.35497	3.96929
Repeat 3	3.30126	4.30106	2.49445	4.06544
Average	3.27842	4.66997	3.17437	3.9377
p Value	0.0238	-	0.0166	0.2488
95% CI of difference	[0.2080, 2.575]	-	[0.3121, 2.679]	[-0.4513, 1.916]
		Paraquat as the control.

## Sheet: Lung wet-dry(Fig.3D)
Lung Wet/Dry
	Control	Paraquat	Paraquat + CoQ 62.5 mg/kg	Paraquat + CoQ 125 mg/kg
Repeat 1	4.12162	4.69395	4.32852	4.05
Repeat 2	2.51622	5.14208	4.29858	4.12733
Repeat 3	2.4005	5.59603	4.40373	4.19118
Repeat 4	4.21021	6.20403	4.16364	4.49164
Average	3.31214	5.40902	4.29862	4.21504
p Value	0.0009	-	0.0561	0.0395
95% CI of difference	[0.9589, 3.235]	-	[-0.02762, 2.248]	[0.05596, 2.332]
		Paraquat as the control.

## Sheet: Pathological section(Fig.3E-H)
E. Control				F. Paraquat
G. Paraquat + CoQ 62.5 mg/kg				H. Paraquat + CoQ 125 mg/kg
